# Supplementary material for: Role of osteoprotegerin in the regulation of dental epithelial-mesenchymal signaling during tooth development
Source: PubMed Central journal article supplement — Mol Med Rep. 2019 Aug 7;20(4):3035–42. doi: 10.3892/mmr.2019.10567 (PMC6755199; doi:10.3892/mmr.2019.10567), 2019-08-07
Supplement: Supplementary_Data.pdf [file Supplementary_Data.pdf]

Figure S1. Study design (schematic). (A) Design and results of protein microarray analysis. (B) Overview of OPG expression during tooth development. (C) Study evaluating the effect of OPG on prenatal tooth development. (D) *In vitro* and *in vivo* studies. (E) Underlying mechanism for the influence of OPG on prenatal tooth development. OPG, osteoprotegerin.

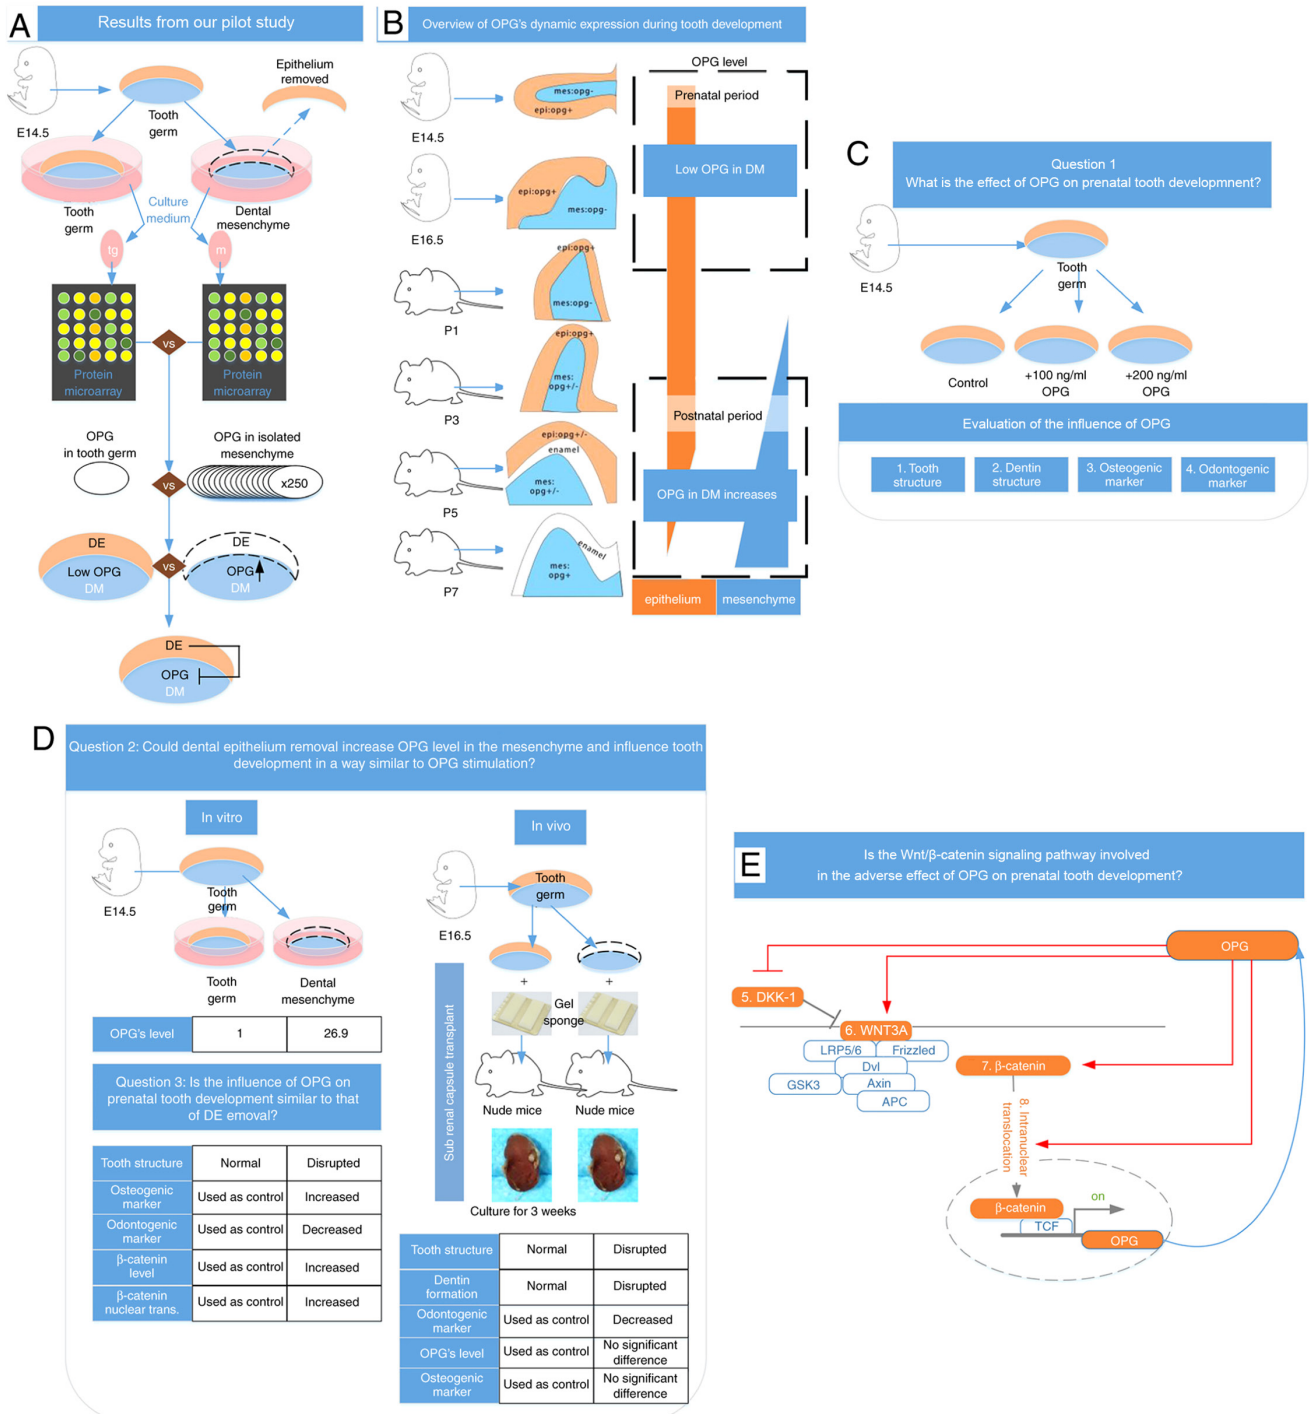

Table SI. Primers for qRT-PCR analysis.

| Gene target      | Sequences                                                            |
|------------------|----------------------------------------------------------------------|
| ALP              | F: 5'-GCCCTCTCCAAGACATATA-3'<br>R: 5'-CCATGATCACGTTCGATATCC-3'       |
| DSPP             | F: 5'-TGAAGAAGGCGACAGTACCC-3'<br>R: 5'-TCACTTTCGTCACTTCCGTTAG-3'     |
| GAPDH            | F: 5'-CTACCCCAATGTGTCCGTCG-3'<br>R: 5'-TGAGGTCCACCACCCTGTTGC-3'      |
| OCN              | F: 5'-TTGTGCTGGGGTGGTTTCTG-3'<br>R: 5'-AGCCTTCCCAACCCCTATT-3'        |
| OPG              | F: 5'-CTCCTGGACATCATTGAATGGAC-3'<br>R: 5'-AGTTTCTGGGTCATAATGCAAGT-3' |
| OPN              | F: 5'-GCCTGTTTGGCATTGCCTCCTC-3'<br>R: 5'-CACAGCATTCTGTGGCGCAAGG-3'   |
| RUNX2            | F: 5'-GCACAAACATGGCCAGATTCA-3'<br>R: 5'-AAGCCATGGTGCCCGTTAG-3'       |
| $\beta$ -catenin | F: 5'-AAGGCGTGGCAACATAC-3'<br>R: 5'-GTCCTGAAGAGGGAAGT-3'             |
| WNT3A            | F: 5'-CATGCACCTCAAGTGCAAATG-3'<br>R: 5'-TGAGGAAATCCCGATGGT-3'        |
| DKK-1            | F: 5'-ATTCCAACGCTATCAAGAACC-3'<br>R: 5'-CCAAGGTGCTATGATCATTACC-3'    |

ALP, alkaline phosphatase; DSPP, dentin sialophosphoprotein; OCN, osteocalcin; OPG, osteoprotegerin; OPN, osteopontin; RUNX2, runt-related transcription factor 2; F, forward; R, reverse.
